# Supplementary material for: An electronic health record driven algorithm to identify incident antidepressant medication users
Source: PubMed Central journal article supplement — J Am Med Inform Assoc. 2014 Apr 29;21(5):785–91. doi: 10.1136/amiajnl-2014-002699 (PMC4147111; doi:10.1136/amiajnl-2014-002699), 2014-04-29
Supplement: amiajnl-2014-002699-s2.pdf [file amiajnl-2014-002699-s2.pdf]

**Supplemental Table S1. Study Drugs**

| <b>Antidepressants</b>   |                      | <b>Antihistamines</b>  |                      |
|--------------------------|----------------------|------------------------|----------------------|
| <b>By generic name</b>   | <b>By brand name</b> | <b>By generic name</b> | <b>By brand name</b> |
| Amitriptyline            | Anafranil            | Cetirizine             | Alavert              |
| Amoxapine                | Aventyl              | Chlorpheniramine       | Allegra              |
| Bupropion                | Celexa               | Desloratadine          | Allegra allergy      |
| Citalopram               | Cymbalta             | Diphenhydramine        | Allegra ODT          |
| Clomipramine             | Effexor              | Fexofenadine           | Allergy              |
| Desipramine              | Effexor XR           | Hydroxyzine            | Allergy relief       |
| Desvenlafaxine           | Elavil               | Levocetirizine         | Banophen             |
| Doxepin                  | EMSAM                | Loratadine             | Benadryl             |
| Duloxetine               | Lexapro              |                        | Benadryl allergy     |
| Escitalopram             | Ludiomil             |                        | Child allergy        |
| Fluoxetine               | Luvox                |                        | Clarinex             |
| Fluvoxamine              | Luvox CR             |                        | Claritin             |
| Imipramine               | Marplan              |                        | Clear-atadine        |
| Isocarboxazid            | Nardil               |                        | OHM allergy relief   |
| Maprotiline              | Norpramin            |                        | Pitching rest        |
| Milnacipran              | Pamelor              |                        | Q-dryl               |
| Mirtazapine              | Parnate              |                        | Vistaril             |
| Nefazodone               | Paxil                |                        | Xyzal                |
| Nortriptyline            | Paxil CR             |                        | Zyrtec               |
| Paroxetine               | Pexeva               |                        |                      |
| Phenelzine               | Pristiq              |                        |                      |
| Protriptyline            | Prozac               |                        |                      |
| Selegiline (transdermal) | Prozac weekly        |                        |                      |
| Sertraline               | Remeron              |                        |                      |
| Tranylcypromine          | Remeron SolTab       |                        |                      |
| Trimipramine             | Sarafem              |                        |                      |
| Venlafaxine              | Savella              |                        |                      |
| Vilazodone               | Serzone              |                        |                      |
|                          | Silenor              |                        |                      |
|                          | Sinequan             |                        |                      |
|                          | Surmontil            |                        |                      |
|                          | Tofranil             |                        |                      |
|                          | Tofranil PM          |                        |                      |
|                          | Viibryd              |                        |                      |
|                          | Vivactil             |                        |                      |
|                          | Wellbutrin           |                        |                      |
|                          | Wellbutrin SR        |                        |                      |
|                          | Wellbutrin XL        |                        |                      |
|                          | Zoloft               |                        |                      |

**Supplemental Table S2. Standardized doses for antidepressant drugs**

| <b>Drug name</b>                                                                                                                                                                                                                                                                                                                                                                                                                                                                                                                                                             | <b>Standardized dose (mg/day)</b> |
|------------------------------------------------------------------------------------------------------------------------------------------------------------------------------------------------------------------------------------------------------------------------------------------------------------------------------------------------------------------------------------------------------------------------------------------------------------------------------------------------------------------------------------------------------------------------------|-----------------------------------|
| <b>Selective serotonin reuptake inhibitors</b>                                                                                                                                                                                                                                                                                                                                                                                                                                                                                                                               |                                   |
| Citalopram                                                                                                                                                                                                                                                                                                                                                                                                                                                                                                                                                                   | 20                                |
| Escitalopram                                                                                                                                                                                                                                                                                                                                                                                                                                                                                                                                                                 | 10                                |
| Fluoxetine                                                                                                                                                                                                                                                                                                                                                                                                                                                                                                                                                                   | 20                                |
| Fluvoxamine                                                                                                                                                                                                                                                                                                                                                                                                                                                                                                                                                                  | 50                                |
| Paroxetine                                                                                                                                                                                                                                                                                                                                                                                                                                                                                                                                                                   | 20                                |
| Sertraline                                                                                                                                                                                                                                                                                                                                                                                                                                                                                                                                                                   | 50                                |
| <b>Serotonin-norepinephrine reuptake inhibitors</b>                                                                                                                                                                                                                                                                                                                                                                                                                                                                                                                          |                                   |
| Desvenlafaxine                                                                                                                                                                                                                                                                                                                                                                                                                                                                                                                                                               | 50                                |
| Duloxetine                                                                                                                                                                                                                                                                                                                                                                                                                                                                                                                                                                   | 40                                |
| Venlafaxine                                                                                                                                                                                                                                                                                                                                                                                                                                                                                                                                                                  | 75                                |
| <b>Tricyclic antidepressants</b>                                                                                                                                                                                                                                                                                                                                                                                                                                                                                                                                             |                                   |
| Amitriptyline                                                                                                                                                                                                                                                                                                                                                                                                                                                                                                                                                                | 25                                |
| Amoxapine                                                                                                                                                                                                                                                                                                                                                                                                                                                                                                                                                                    | 50                                |
| Clomipramine                                                                                                                                                                                                                                                                                                                                                                                                                                                                                                                                                                 | 25                                |
| Desipramine                                                                                                                                                                                                                                                                                                                                                                                                                                                                                                                                                                  | 25                                |
| Doxepin                                                                                                                                                                                                                                                                                                                                                                                                                                                                                                                                                                      | 75                                |
| Imipramine                                                                                                                                                                                                                                                                                                                                                                                                                                                                                                                                                                   | 75                                |
| Maprotiline                                                                                                                                                                                                                                                                                                                                                                                                                                                                                                                                                                  | 25                                |
| Nortriptyline                                                                                                                                                                                                                                                                                                                                                                                                                                                                                                                                                                | 25                                |
| Protriptyline                                                                                                                                                                                                                                                                                                                                                                                                                                                                                                                                                                | 15                                |
| Trimipramine                                                                                                                                                                                                                                                                                                                                                                                                                                                                                                                                                                 | 25                                |
| <b>Monoamine oxidase inhibitors</b>                                                                                                                                                                                                                                                                                                                                                                                                                                                                                                                                          |                                   |
| Isocarboxazid                                                                                                                                                                                                                                                                                                                                                                                                                                                                                                                                                                | 20                                |
| Phenelzine                                                                                                                                                                                                                                                                                                                                                                                                                                                                                                                                                                   | 45                                |
| Selegiline (transdermal only)                                                                                                                                                                                                                                                                                                                                                                                                                                                                                                                                                | 6                                 |
| Tranlycypromine                                                                                                                                                                                                                                                                                                                                                                                                                                                                                                                                                              | 10                                |
| <b>Miscellaneous antidepressants</b>                                                                                                                                                                                                                                                                                                                                                                                                                                                                                                                                         |                                   |
| Bupropion                                                                                                                                                                                                                                                                                                                                                                                                                                                                                                                                                                    | 150                               |
| Milnacipran                                                                                                                                                                                                                                                                                                                                                                                                                                                                                                                                                                  | 12.5                              |
| Mirtazapine                                                                                                                                                                                                                                                                                                                                                                                                                                                                                                                                                                  | 15                                |
| Nefazodone                                                                                                                                                                                                                                                                                                                                                                                                                                                                                                                                                                   | 100                               |
| Vilazodone                                                                                                                                                                                                                                                                                                                                                                                                                                                                                                                                                                   | 10                                |
| <p><b>References:</b> M.A. Fuller, M. Sajatovic. <i>Drug Information Handbook for Psychiatry, 6<sup>th</sup> Edition</i>. Hudson, OH: Lexi-Comp, 2007; A.F. Schatzberg, C.B. Nemeroff (eds.). <i>Textbook of Psychopharmacology, 4<sup>th</sup> Edition</i>. Washington, DC: American Psychiatric Publishing, Inc., 2009; vilazodone prescribing information (<a href="http://www.frx.com/pi/viibryd_pi.pdf">www.frx.com/pi/viibryd_pi.pdf</a>); milnacipran prescribing information (<a href="http://www.frx.com/pi/Savella_pi.pdf">www.frx.com/pi/Savella_pi.pdf</a>).</p> |                                   |

**Supplemental Table S3. Indications for antidepressants recorded in medical record (n=198)**

| <b>Indication</b>                         | <b>N</b> | <b>% overall (n = 198)</b> | <b>% by category<sup>a</sup></b> |
|-------------------------------------------|----------|----------------------------|----------------------------------|
| Psychiatric Disorders, total <sup>b</sup> | 147      | 74.2                       | 100.0                            |
| Depressive (unipolar) disorders           | 80       | 40.4                       | 54.4                             |
| Bipolar and related disorders             | 3        | 1.5                        | 2.0                              |
| Other mood disorders                      | 13       | 6.6                        | 8.8                              |
| Anxiety disorders                         | 34       | 17.2                       | 23.1                             |
| Trauma-/stressor-related disorders        | 6        | 3.0                        | 4.1                              |
| Obsessive-compulsive and related          | 1        | 0.5                        | 0.7                              |
| Sleep-wake disorders                      | 6        | 3.0                        | 4.1                              |
| Other psychiatric disorders               | 4        | 2.0                        | 2.7                              |
|                                           |          |                            |                                  |
| General Medical Disorders, total          | 49       | 35.8                       | 100.0                            |
| Headache syndromes                        | 14       | 7.1                        | 28.6                             |
| Chronic pain syndromes                    | 12       | 6.1                        | 24.5                             |
| Neuro-cardiovascular symptoms             | 3        | 1.5                        | 6.1                              |
| Functional gastrointestinal syndromes     | 3        | 1.5                        | 6.1                              |
| Perimenopausal symptoms                   | 4        | 2.0                        | 8.2                              |
| Smoking cessation                         | 9        | 4.5                        | 18.4                             |
| Other general medical indications         | 4        | 2.0                        | 8.2                              |
|                                           |          |                            |                                  |
| Unknown/no indication listed              | 2        | 1.0                        | 100.0                            |

<sup>a</sup> For psychiatric indications, the total of 147 was used as the denominator; for general medical indications, the total of 49 was used as the denominator; and for unknown/no indication listed, the total of 2 was used as the denominator.

<sup>b</sup> Psychiatric indications were grouped according to the classification system published in the Diagnostic and Statistical Manual of Mental Disorders, 5<sup>th</sup> Edition (DSM-5).
